# Supplementary material for: Identification of HCC-Related Genes Based on Differential Partial Correlation Network
Source: Front Genet. 2021 Jul 15;12:672117. doi: 10.3389/fgene.2021.672117 (PMC8320536; doi:10.3389/fgene.2021.672117)
Supplement: Supplementary file 10 [file Table_2.XLSX]

## Sheet: Sheet1
Supplementary Table 2. (Sheet1)Top 20 DAVID enrichment results for the second candidate gene set
Category	Term	Count	%	PValue	FDR
KEGG_PATHWAY	hsa04520:Adherens junction	20	8.29876	5.2518e-15	4.80721e-13
KEGG_PATHWAY	hsa05205:Proteoglycans in cancer	30	12.4481	1.03381e-14	4.80721e-13
KEGG_PATHWAY	hsa05200:Pathways in cancer	39	16.1826	3.35403e-13	1.03975e-11
KEGG_PATHWAY	hsa05213:Endometrial cancer	15	6.22407	2.15427e-11	4.9383e-10
KEGG_PATHWAY	hsa04110:Cell cycle	21	8.71369	2.655e-11	4.9383e-10
KEGG_PATHWAY	hsa04919:Thyroid hormone signaling pathway	20	8.29876	5.57198e-11	8.63656e-10
KEGG_PATHWAY	hsa05203:Viral carcinogenesis	25	10.3734	2.61281e-10	2.99013e-09
KEGG_PATHWAY	hsa05210:Colorectal cancer	15	6.22407	2.83738e-10	2.99013e-09
KEGG_PATHWAY	hsa04510:Focal adhesion	25	10.3734	2.89368e-10	2.99013e-09
KEGG_PATHWAY	hsa05215:Prostate cancer	17	7.05394	4.55761e-10	4.23858e-09
KEGG_PATHWAY	hsa05212:Pancreatic cancer	15	6.22407	5.56849e-10	4.70791e-09
KEGG_PATHWAY	hsa04068:FoxO signaling pathway	20	8.29876	8.47054e-10	6.56467e-09
KEGG_PATHWAY	hsa05161:Hepatitis B	20	8.29876	3.3098e-09	2.36778e-08
KEGG_PATHWAY	hsa05166:HTLV-I infection	26	10.7884	4.30531e-09	2.85996e-08
KEGG_PATHWAY	hsa04915:Estrogen signaling pathway	16	6.639	2.22263e-08	1.37803e-07
KEGG_PATHWAY	hsa05130:Pathogenic Escherichia coli infection	12	4.97925	4.15337e-08	2.41415e-07
KEGG_PATHWAY	hsa04722:Neurotrophin signaling pathway	17	7.05394	4.81143e-08	2.63214e-07
KEGG_PATHWAY	hsa05221:Acute myeloid leukemia	12	4.97925	1.1627e-07	6.00729e-07
KEGG_PATHWAY	hsa04660:T cell receptor signaling pathway	15	6.22407	1.85673e-07	9.08819e-07
KEGG_PATHWAY	hsa05220:Chronic myeloid leukemia	13	5.39419	2.05181e-07	9.5409e-07

## Sheet: Sheet2
Supplementary Table 2. (Sheet2) 244 genes of the second candidate gene set
gene	edges in Diff-PCORN	edges in Diff-MN	frequency of variation
TP53BP1	97	56	0.0110497
BPTF	88	37	0.0331492
MAPK1	81	42	0.00828729
DHX9	69	30	0.0303867
TP53	69	23	0.232044
EP300	69	16	0.0303867
TOP2A	68	37	0.0138122
TPX2	68	32	0.00828729
CREB1	64	21	0.00276243
NCL	61	31	0.00552486
ZWINT	60	25	0.0110497
PIK3CA	57	17	0.0276243
ABL1	57	50	0.00552486
TTK	56	22	0.00828729
SF3B1	56	32	0.0248619
MSH2	55	33	0
XPO1	55	31	0.0110497
MELK	55	27	0.0138122
RFC4	54	16	0
ATM	53	21	0.0359116
RUVBL1	52	26	0.00276243
SP1	52	36	0.00828729
HNRNPU	52	23	0.00276243
CTNNB1	52	18	0.248619
DHX15	52	21	0.0138122
TRIP12	52	28	0.038674
UBE2I	50	28	0.00276243
BUB1	50	16	0.00828729
CREBBP	50	32	0.0220994
SIN3A	50	34	0.00828729
SMARCA4	49	32	0.0276243
POLR2A	49	28	0.00552486
DNMT1	49	36	0.0110497
MDC1	48	32	0.019337
NIPBL	48	25	0.0276243
SRC	48	40	0.00828729
NOTCH1	47	33	0.0165746
ANAPC1	47	17	0.0110497
SFPQ	47	29	0.00552486
CDK1	47	18	0.00552486
EXO1	47	22	0.019337
MAPK3	46	27	0
ILF3	45	29	0.00828729
LPHN2	45	25	0
RAN	45	18	0
SMC3	44	21	0.0138122
FBXO11	44	27	0
POLR2B	44	17	0.0138122
DLG4	43	33	0.00552486
ACTR2	43	22	0
BUB1B	42	16	0.00276243
DDX55	42	19	0.00552486
NFKB1	42	16	0.0110497
UBE2N	42	23	0.00828729
NCOR2	42	33	0.0220994
SMURF2	41	25	0.00276243
CENPE	41	18	0.0303867
RAB11A	40	21	0
RBM28	40	24	0.0138122
GMPS	40	19	0.0138122
SMAD2	40	23	0
CDH1	39	27	0.019337
NAT10	39	20	0.00552486
EGFR	39	29	0.0110497
VCL	39	27	0.0110497
CUL3	39	26	0.00276243
PKM	39	24	0
RHOA	39	21	0.00276243
U2AF2	39	23	0.0138122
RAB7A	39	19	0.00552486
FLNA	39	26	0.0138122
HCFC1	38	19	0.0110497
KMT2A	38	18	0.0220994
BBS10	38	22	0.00552486
BTRC	38	17	0.0110497
HNRNPL	38	24	0.0110497
ADAM10	38	24	0.00828729
TRAF6	38	16	0.0110497
EPRS	38	22	0.0138122
ARF6	38	25	0.019337
SSRP1	38	24	0.00276243
SNRNP200	38	25	0.00828729
LPHN3	37	22	0
CHD8	37	20	0.0110497
CPSF6	37	21	0.00276243
AKT1	37	29	0
GRB2	37	26	0.00276243
RNF4	36	26	0
ACTB	36	21	0.00276243
XRN1	36	21	0.0110497
SUZ12	36	22	0.00552486
SIRT1	36	28	0.00552486
LCP2	36	23	0.019337
ALDH18A1	36	22	0.00276243
CDC6	35	19	0
MAP3K7	35	22	0.0138122
H2AFX	35	17	0
EWSR1	35	17	0.0138122
SMAD3	35	28	0.00828729
SRRT	35	24	0.00552486
TRRAP	35	27	0.019337
CAT	35	22	0.00552486
C2CD3	34	16	0.019337
RACGAP1	34	21	0.00828729
MAPRE1	34	17	0.00276243
SNRPB	34	18	0
PPP2R1A	34	16	0.00828729
CKAP2L	34	16	0.00276243
NCK2	34	29	0.00276243
DCTN1	34	19	0.00828729
WHSC1	33	24	0.0220994
KIFC1	33	23	0.00828729
VPS26A	33	22	0
EZH2	33	24	0.00552486
CCNT1	33	26	0.00552486
MCM6	33	20	0.00552486
DYNC1I2	33	20	0.00276243
PPP1R12A	33	17	0.00828729
VPRBP	33	16	0.00276243
RANBP2	33	19	0.0276243
USP7	33	18	0.0110497
YWHAQ	32	23	0
FBXL19	32	25	0.00552486
UBA52	32	16	0.00276243
KDM5C	32	20	0.00552486
YAP1	32	18	0
NRAS	32	17	0.0110497
DYNC1H1	32	19	0.0359116
BMS1	32	23	0.0110497
HEATR1	32	17	0.0138122
TJP1	32	17	0.019337
KHDRBS1	32	21	0
CTNNA1	32	18	0.0165746
KIF11	32	21	0.00828729
POLQ	31	16	0.0469613
CBX1	31	18	0
CHD4	31	22	0.0220994
HNRNPR	31	17	0.00276243
TOP1	31	17	0.00828729
CAV1	31	16	0.00276243
GNG2	31	16	0
FGFR1	30	22	0.00828729
EHMT2	30	23	0.00828729
DHX37	30	19	0.019337
SIN3B	30	17	0.0110497
PTPRC	30	16	0.0165746
EXOC2	30	20	0.00552486
NUP160	29	16	0.00552486
STAT3	29	17	0.0110497
LRPPRC	29	20	0.0110497
ATR	29	18	0.0414365
PRKCA	29	24	0.00276243
CD86	29	16	0.00828729
GINS1	29	18	0
HNRNPH1	28	16	0.0138122
DYRK1A	28	18	0.0165746
PCF11	28	16	0.00828729
EIF3A	28	17	0.0110497
MEX3C	28	20	0.00828729
RAB6A	28	19	0.00552486
SRSF3	28	20	0.00552486
PXN	28	17	0
TXNRD1	28	16	0.00276243
PPP3CA	28	18	0.00552486
UBE2E1	28	20	0.00276243
JAK1	27	19	0.0303867
DDX23	27	16	0.00276243
RAB35	27	16	0
ANXA2	27	16	0.00276243
RNF111	27	17	0.00552486
RRM1	27	17	0.0138122
CDC7	27	17	0.0110497
SRRM1	27	16	0.0138122
CNOT1	27	18	0.0165746
KIF3A	27	20	0.00828729
PUM2	27	20	0.0110497
PTBP1	26	17	0.0138122
ROCK1	26	17	0.0110497
UHRF1	26	19	0.00276243
TCF3	26	19	0.00276243
YWHAZ	26	19	0.00552486
UBTF	26	16	0.00276243
RAP1B	26	17	0
FIP1L1	26	21	0.0110497
KCTD7	25	16	0
DNAJC13	25	17	0.0165746
ADCY3	25	23	0.0110497
NTRK2	25	17	0.0248619
PRKG1	25	20	0.0220994
ARID1A	25	16	0.0414365
PRKACA	25	17	0.0110497
CBFB	25	17	0.00276243
RAC1	25	17	0
SPI1	25	16	0.00828729
LAMB1	25	19	0.0220994
MTA2	25	16	0.00828729
CACNA1C	24	23	0.0331492
AGFG1	24	16	0.00276243
EZR	24	18	0.00552486
MCM3	24	16	0.00552486
HYOU1	24	17	0.00828729
SETD1B	24	21	0.0165746
IKZF1	24	22	0.019337
MED1	24	17	0.00552486
GABBR1	23	16	0.0220994
ESR1	23	17	0.0110497
HSPG2	23	18	0.0220994
RAB1A	23	16	0.00552486
CLASP1	23	17	0.00552486
MMP2	23	19	0.00552486
PHF21A	23	19	0.00276243
RUNX2	23	22	0.00828729
AGO2	23	20	0.00552486
THRAP3	22	17	0.00552486
RALA	22	17	0.00276243
AXIN1	22	18	0.0497238
CDH5	22	19	0.00552486
CTBP1	22	19	0.00276243
BRAF	22	19	0
MMP14	22	17	0.00828729
SMNDC1	22	16	0.00276243
EHMT1	22	20	0.00828729
GRN	22	16	0.00276243
PLXNA1	21	20	0.0165746
AP1B1	21	17	0.00828729
PIP5K1C	21	17	0.00276243
MYC	21	19	0.00276243
SLIT2	21	18	0.0331492
TUBB	20	17	0.00276243
PIK3CD	20	20	0.0110497
IRS1	20	17	0.00276243
PIP4K2A	20	16	0.00276243
DNMT3A	20	17	0.0138122
TFRC	19	16	0.00552486
GATA4	19	17	0.00276243
IGF1R	19	16	0.0331492
EP400	19	16	0.0138122
RBPJ	19	16	0.00276243
RUNX3	18	18	0.00552486
PLEC	18	16	0.019337
THBS2	18	17	0.0138122
ITPKB	17	17	0.019337
FYN	17	17	0.00276243
VPS52	16	16	0.019337
